# Supplementary material for: Highly efficient green and red electroluminescence with an extremely low efficiency roll-off based on iridium(iii) complexes containing a bis(diphenylphorothioyl)amide ancillary ligand
Source: Royal Society of Chemistry journal article supplement (doi:10.1039/c8tc06346j), 2019-01-01
Supplement: c8tc06346j1.pdf [file c8tc06346j1.pdf]

## Supporting Information

### Highly efficient green and red electroluminescence with extremely low efficiency roll-off based on iridium(III) complexes containing bis(diphenylphosphorothioyl)amide ancillary ligand

Xiao-Feng Ma,<sup>‡a</sup> Jing-Cheng Xia,<sup>‡a</sup> Zhi-Ping Yan,<sup>a</sup> Xu-Feng Luo,<sup>a</sup> Zheng-Guang Wu,<sup>\*a</sup> You-Xuan Zheng<sup>\*a,b</sup> and Wen-Wei Zhang<sup>\*a</sup>

<sup>a</sup> State Key Laboratory of Coordination Chemistry, Jiangsu Key Laboratory of Advanced Organic Materials, Collaborative Innovation Center of Advanced Microstructures, School of Chemistry and Chemical Engineering, Nanjing University, Nanjing 210093, P. R. China, \*E-mail: wuzhengguang\_zy@163.com, yxzhang@nju.edu.cn, wwzhang@nju.edu.cn

<sup>b</sup> Shenzhen Research Institute of Nanjing University, Shenzhen 518057, P. R. China

<sup>‡</sup> Ma and Xia contributed equally to this work.

#### General information

<sup>1</sup>H NMR spectra were measured on a Bruker AM 400 spectrometer. The high resolution electrospray ionization mass spectra (HR ESI-MS) were recorded on an Bruker MTQ III q-TOF. TG measurements were carried out on a TG/DSC\_STA449F3 analyzer (METTLER). UV-vis absorption and photoluminescence spectra were measured on a Shimadzu UV-2550 and a Hitachi F-4600 spectrophotometer at room temperature, respectively. Cyclic voltammetry measurements were conducted on a chi600e electrochemical workstation using Fc<sup>+</sup>/Fc as the internal standard and scan rate of 0.1 V s<sup>-1</sup>. The luminescence quantum efficiencies were calculated by comparison of the emission intensities (integrated areas) of a standard sample (*fac*-Ir(ppy)<sub>3</sub>) and the unknown sample.<sup>1</sup> The decay lifetimes were measured with a HORIBA Scientific 3-D fluorescence spectrometer.

#### Synthesis of cyclometalated ligands.

2-Bromopyrimidine (24 mmol) or 4-chloroquinazoline (24 mmol), 4-(trifluoromethyl)phenyl boronic acid (20 mmol), Na<sub>2</sub>CO<sub>3</sub> (60 mmol), and Pd(PPh<sub>3</sub>)<sub>4</sub> (0.40 mmol) were dissolved in tetrahydrofuran/water (3:1, v/v; 40 mL). The solution was refluxed for 24 h and extracted twice with CH<sub>2</sub>Cl<sub>2</sub> at room temperature. The combined organic solution was concentrated and purified by column chromatography to give 2-(4-(trifluoromethyl)phenyl)pyrimidine (tfpmd; yield: 75 %) and 4-(4-(trifluoromethyl)phenyl)quinazoline (tfpqz; yield: 70 %), respectively.

### Synthesis of ancillary ligand.

A solution of chlorodiphenylphosphine (18.4 mmol) and hexamethyldisilazane (9.23 mmol) in toluene (30 mL) was refluxed overnight, after which the intermediate product was purified by rapid column chromatography. The intermediate product was then dissolved in toluene (30 mL) with  $S_8$  (2.3 mmol) and refluxed overnight giving the bis(diphenylphosphorothioyl)amide (stpip) crude. The mixture was purified by recrystallized from  $CH_2Cl_2$  (50 mL) and dissolved in methanol. After the addition of potassium hydroxide in methanol (0.74 M, 5 mL), the solution was stirred and concentrated to give the desired bis(diphenylphosphorothioyl)amide potassium salt (3.70 mmol, 40% yield).  $^1H$  NMR (400 MHz,  $CD_3OD$ )  $\delta$  7.95-8.01 (m, 8H), 7.22-7.29 (m, 12H).  $^{31}P$  NMR (162 MHz,  $CD_3OD$ )  $\delta$  37.56(2P). MS(ESI): m/z calcd for  $C_{24}H_{20}P_2S_2N^- [M]^-$ : 448.02, found 448.17.

### X-ray crystallography

X-ray crystallographic measurements of the single crystals were carried out on a Bruker SMART CCD diffractometer (Bruker Daltonic Inc.) using monochromated Mo  $K\alpha$  radiation ( $\lambda = 0.71073 \text{ \AA}$ ) at room temperature. Cell parameters were retrieved using SMART software and refined using *SAINT*<sup>2</sup> program in order to reduce the highly redundant data sets. Data were collected using a narrow-frame method with scan width of  $0.30^\circ$  in  $\omega$  and an exposure time of 5 s per frame. Absorption corrections were applied using *SADABS*<sup>3</sup> supplied by Bruker. The structures were solved by Patterson methods and refined by full-matrix leastsquares on  $F^2$  using the program *SHELXS-2014*.<sup>4</sup> The positions of metal atoms and their first coordination spheres were located from direct-methods E-maps, other non-hydrogen atoms were found in alternating difference Fourier syntheses and least-squares refinement cycles and uring the final cycles refined anisotropically. Hydrogen atoms were placed in calculated position and refined as riding atoms with a uniform value of  $U_{iso}$ .

### OLEDs fabrication and measurement

All OLEDs were fabricated on the pre-patterned ITO-coated glass substrate with a sheet resistance of  $15 \Omega / sq$ . The deposition rate for organic compounds (TAPC (di-[4-(N,N-ditolyl-amino)-phenyl]cyclohexane), TCTA (4,4',4''-tri(9-carbazoyl)triphenylamine), 2,6DCzPPy (2,6-bis(3-(carbazol-9-yl)phenyl)pyridine), TmPyPB (1,3,5-*tri*(m-pyrid-3-yl-phenyl) benzene)) is  $1 \text{ \AA/s}$ . The phosphor and the host were co-evaporated to form emitting layer from two separate sources. The cathode of LiF and Al were deposited with deposition rates of  $0.1$  and  $3 \text{ \AA/s}$ , respectively. The characteristic curves of the devices were measured with a computer which controlled KEITHLEY 2400 source meter with a calibrated silicon diode in air without device encapsulation. On the basis of the uncorrected PL and EL spectra, the Commission Internationale de l'Eclairage (CIE) coordinates were calculated using a test program of the Spectra scan PR650 spectrophotometer.

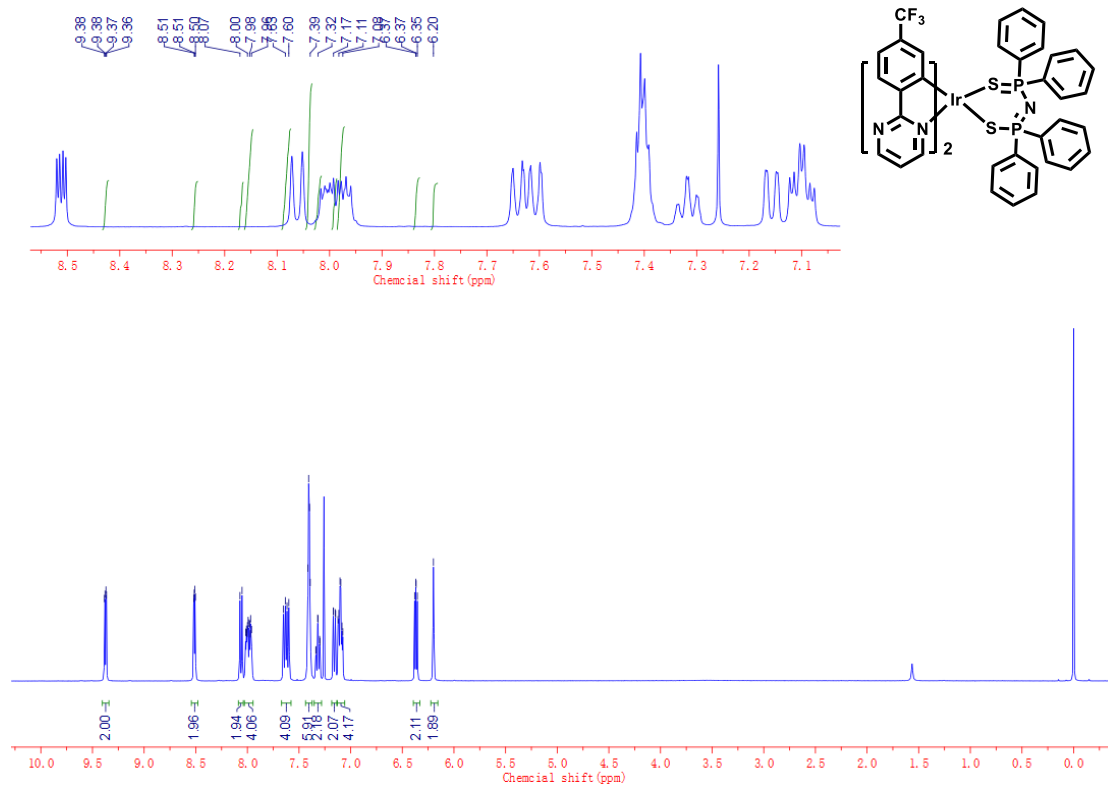

Fig. S1. The  $^1\text{H}$  NMR spectrum of  $\text{Ir}(\text{tfpmid})_2(\text{stpip})$ .

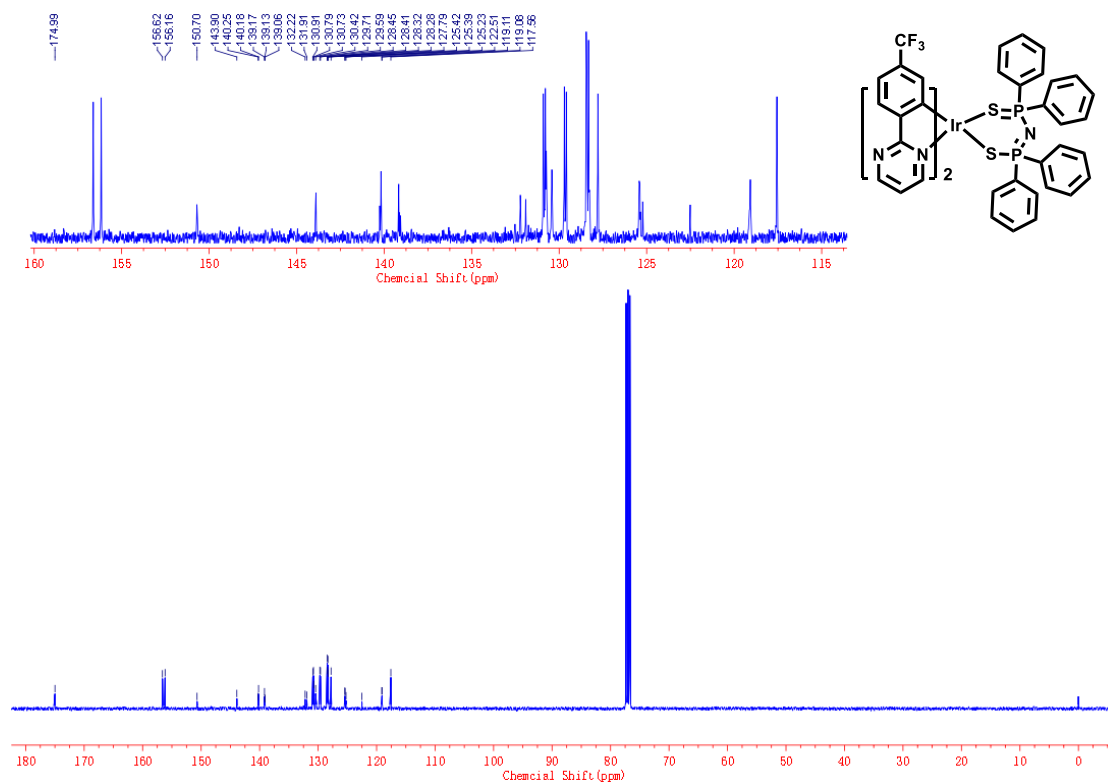

Fig. S2. The  $^{13}\text{C}$  NMR spectrum of  $\text{Ir}(\text{tfpmid})_2(\text{stpip})$ .

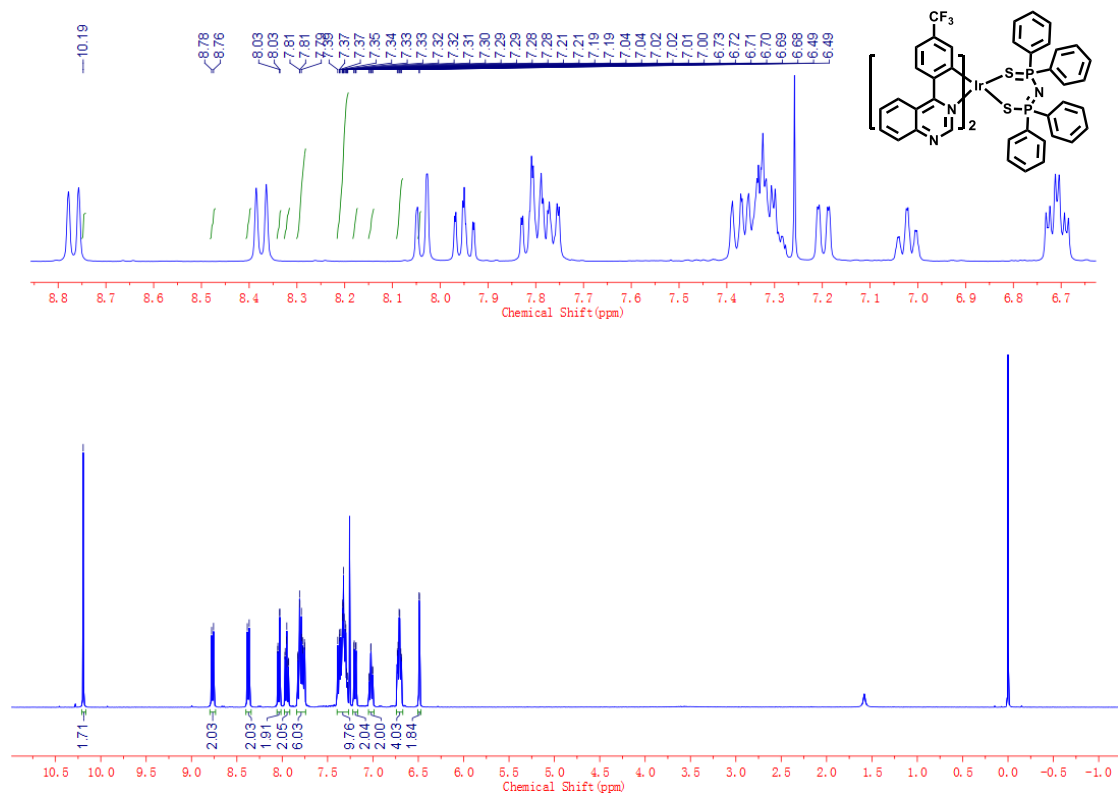

Fig. S3. The  $^1\text{H}$  NMR spectrum of  $\text{Ir}(\text{tfpqz})_2(\text{stpip})$ .

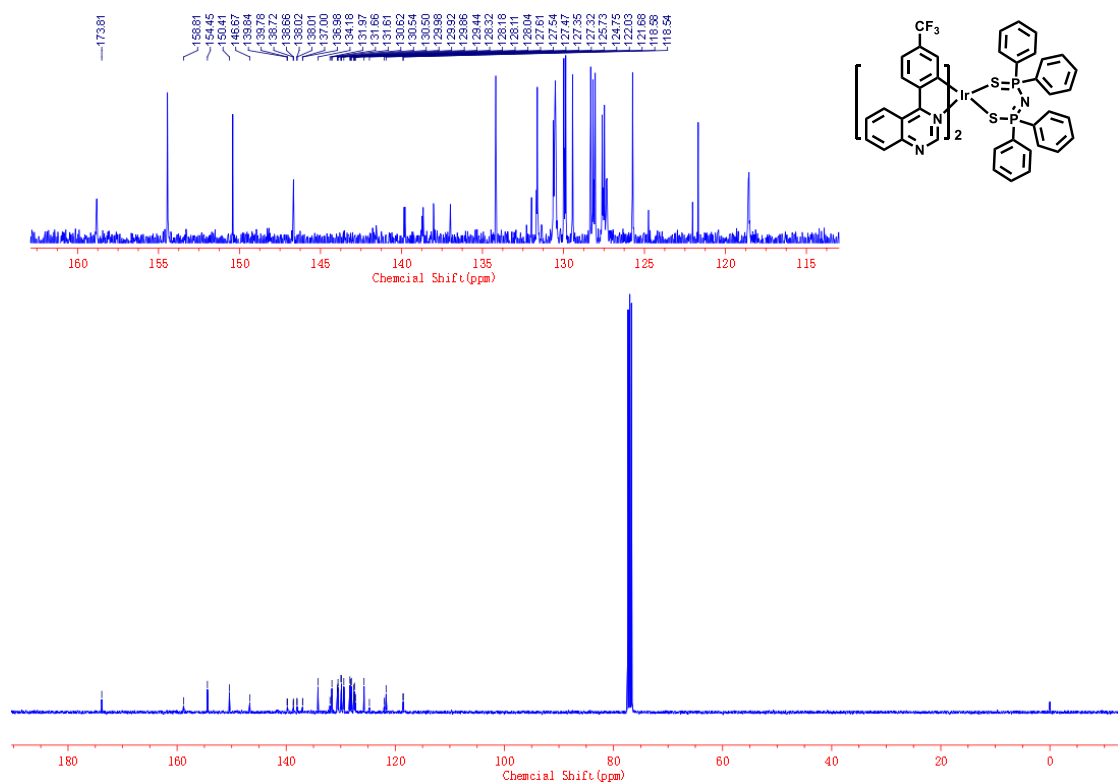

Fig. S4. The  $^{13}\text{C}$  NMR spectrum of  $\text{Ir}(\text{tfpqz})_2(\text{stpip})$ .

# Display Report

**Analysis Info**  
Analysis Name: D:\Data\YangNan\NAN DA\ZYX\20180328\WJU-MS-180328005000001.d  
Method: DirectInfusion\_TuneLow\_pos.m  
Sample Name: tfpmd  
Comment:  
Acquisition Date: 03/29/2018 14:34:25 PM  
Operator: BDAL@DE  
Instrument: micrOTOF-Q III 8228888.20519

**Acquisition Parameter**

|             |          |                       |           |                  |           |
|-------------|----------|-----------------------|-----------|------------------|-----------|
| Source Type | ESI      | Ion Polarity          | Positive  | Set Nebulizer    | 0.4 Bar   |
| Focus       | Active   | Set Capillary         | 4500 V    | Set Dry Heater   | 180 °C    |
| Scan Begin  | 50 m/z   | Set End Plate Offset  | -500 V    | Set Dry Gas      | 4.0 l/min |
| Scan End    | 1500 m/z | Set Collision Cell RF | 640.0 Vpp | Set Divert Valve | Waste     |

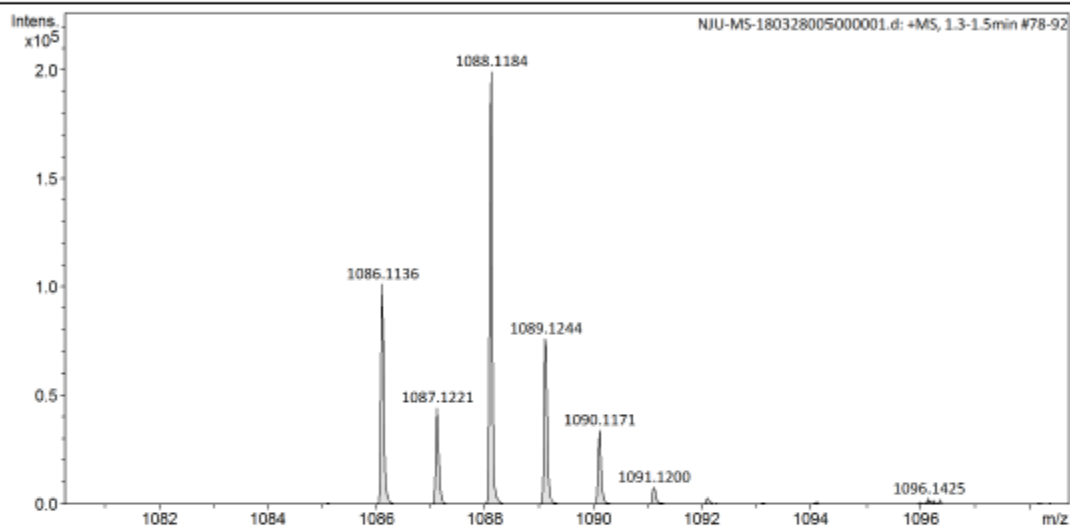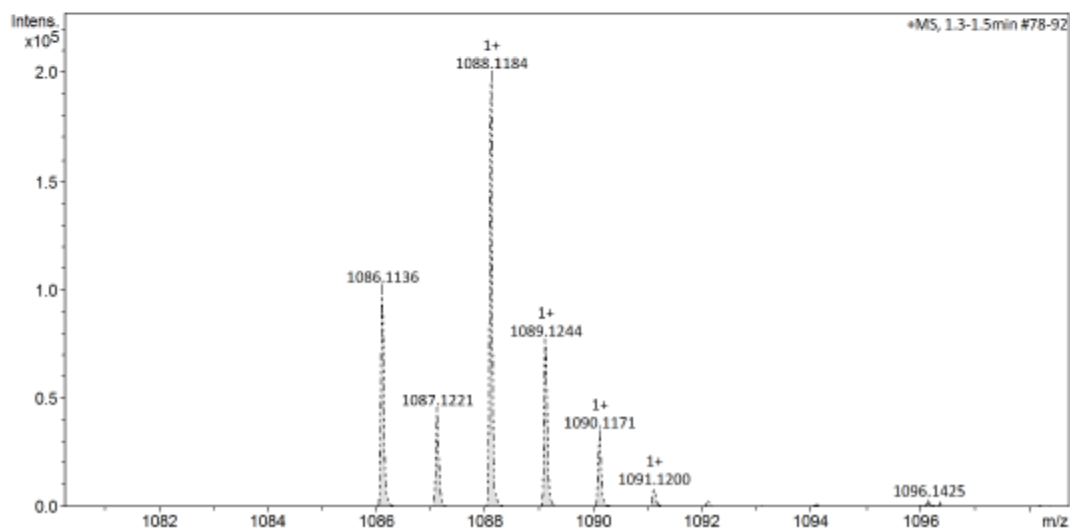

Fig. S5. The mass spectrum of Ir(tfpmd)<sub>2</sub>(stip).

## Display Report

### Analysis Info

Analysis Name D:\Data\YangNan\NAN DA\ZYX\20180328\WJU-MS-180328009000001.d Acquisition Date 03/29/2018 14:55:43 PM  
Method DirectInfusion\_TuneLow\_pos.m Operator BDAL@DE  
Sample Name Tfzql Instrument micrOTOF-Q III 8228888.20519  
Comment

### Acquisition Parameter

|             |          |                       |           |                  |           |
|-------------|----------|-----------------------|-----------|------------------|-----------|
| Source Type | ESI      | Ion Polarity          | Positive  | Set Nebulizer    | 0.4 Bar   |
| Focus       | Active   | Set Capillary         | 4500 V    | Set Dry Heater   | 180 °C    |
| Scan Begin  | 50 m/z   | Set End Plate Offset  | -500 V    | Set Dry Gas      | 4.0 l/min |
| Scan End    | 1500 m/z | Set Collision Cell RF | 640.0 Vpp | Set Divert Valve | Waste     |

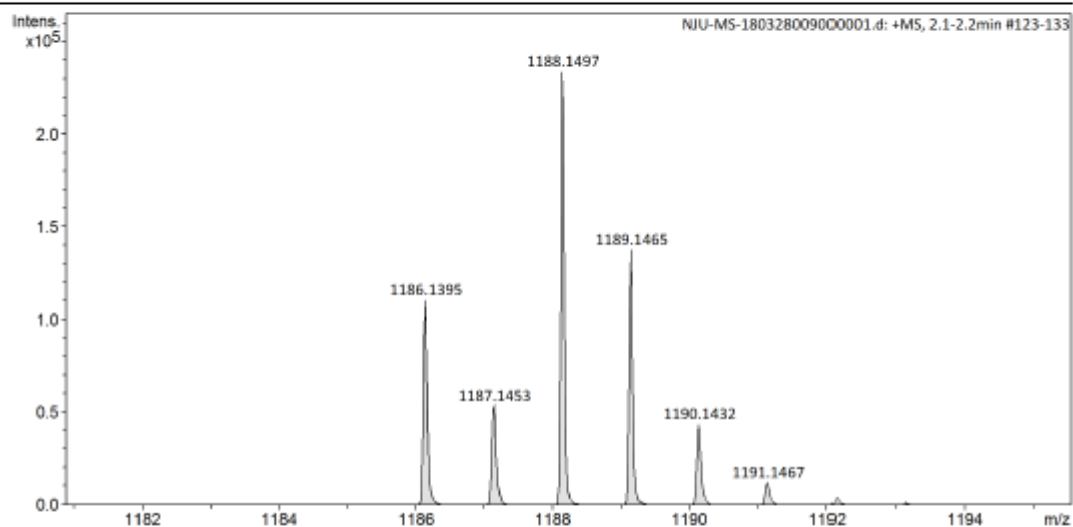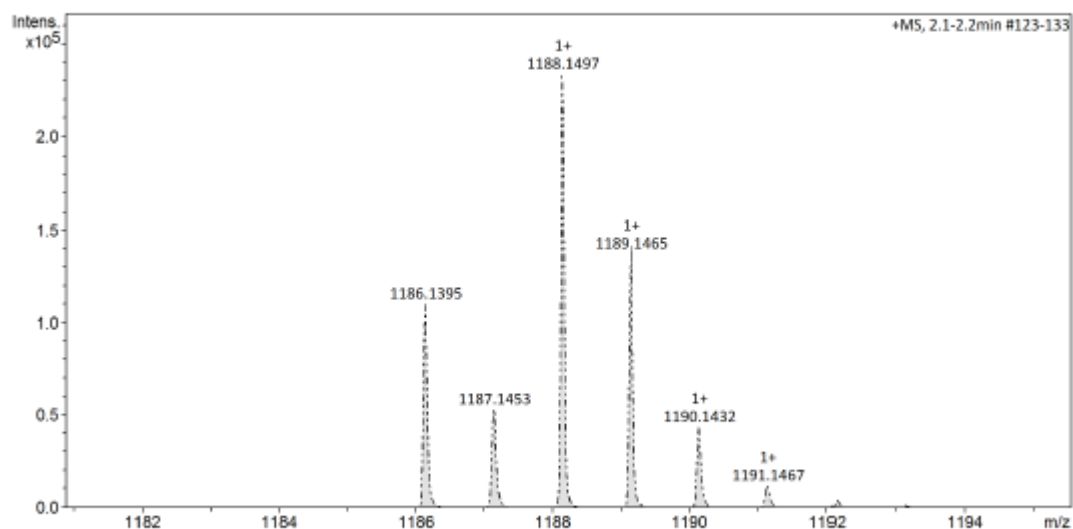

Fig. S6. The mass spectrum of Ir(tpqz)<sub>2</sub>(stip).

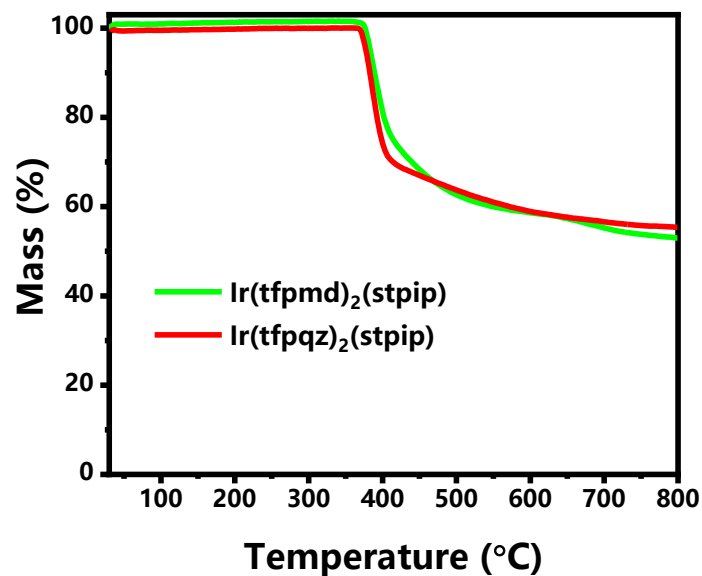

Fig. S7. The TGA curves of Ir(tfpm�)₂(stpip) and Ir(tfpqz)₂(stpip).

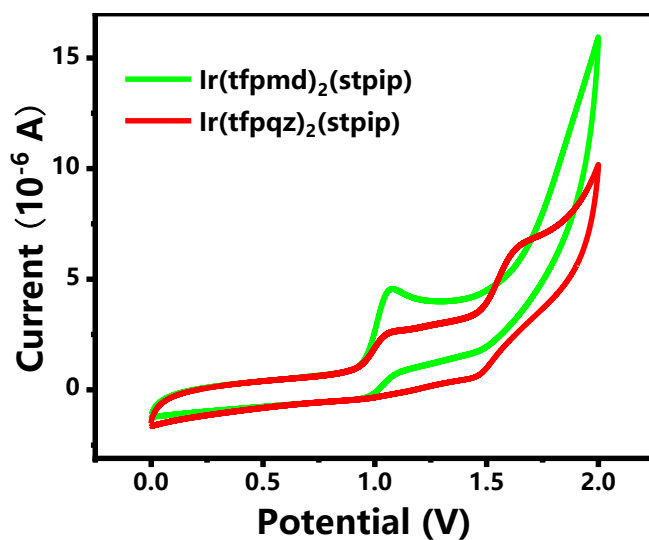

Fig. S8. The cyclic voltammogram curves of Ir(tfpm�)₂(stpip) and Ir(tfpqz)₂(stpip) in the range of 0-2V.

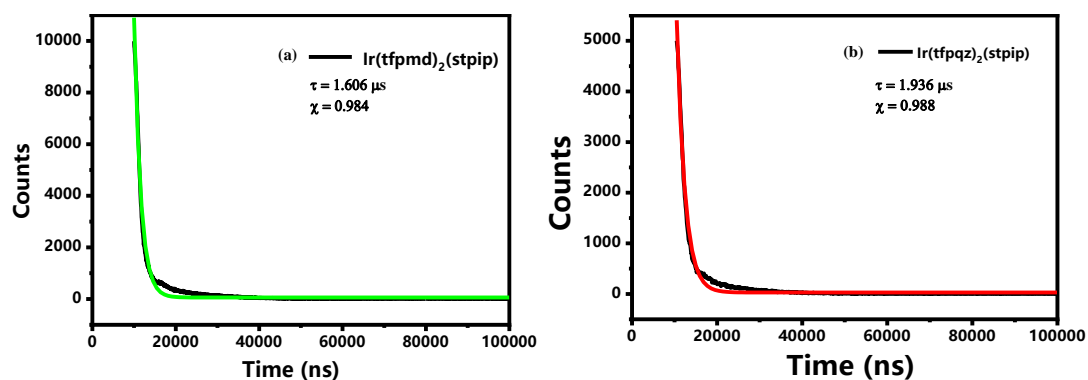

Fig. S9. The lifetime curves of Ir(tfpm�)₂(stpip) and Ir(tfpqz)₂(stpip) complexes.

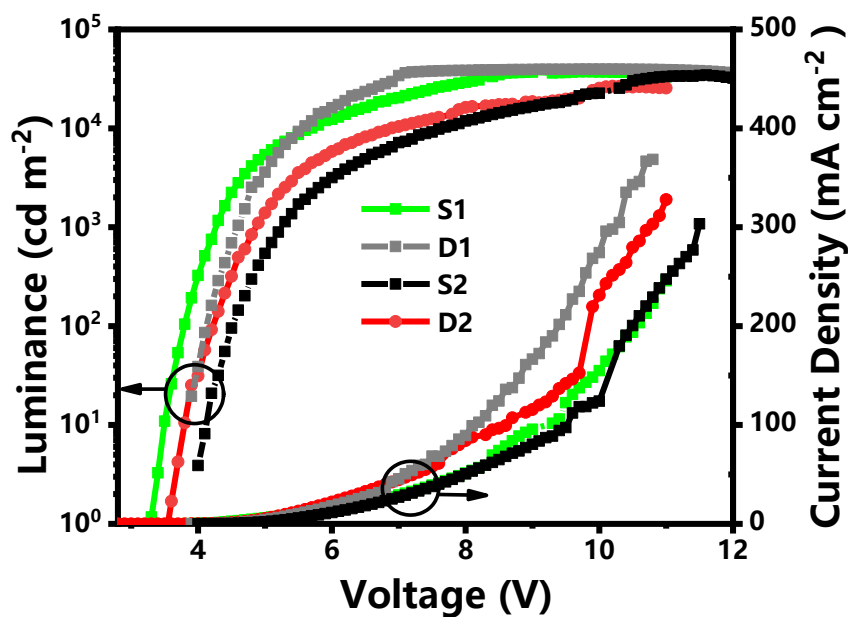

Fig. S10. Luminance-voltage-current density (L-V-J) curves of devices S1, D1, S2 and D2.

Table S1. Crystallographic data of  $\text{Ir}(\text{tfpmd})_2(\text{stpip})$  and  $\text{Ir}(\text{tfpqz})_2(\text{stpip})$ .

|                                                                                                                | $\text{Ir}(\text{tfpmd})_2(\text{stpip})$ | $\text{Ir}(\text{tfpqz})_2(\text{stpip})$ |
|----------------------------------------------------------------------------------------------------------------|-------------------------------------------|-------------------------------------------|
| Formula                                                                                                        | C46 H32 F6 Ir N5 P2 S2                    | C54 H36 F6 Ir N5 P2 S2                    |
| FW                                                                                                             | 1087.02                                   | 1187.14                                   |
| T(K)                                                                                                           | 296(2)                                    | 173(2)                                    |
| Wavelength (Å)                                                                                                 | 0.71073                                   | 0.71073                                   |
| Crystal system                                                                                                 | Monoclinic                                | Triclinic                                 |
| Space group                                                                                                    | P 21/c                                    | P-1                                       |
| <i>a</i> (Å)                                                                                                   | 11.5684(6)                                | 20.775(3)                                 |
| <i>b</i> (Å)                                                                                                   | 16.2297(9)                                | 22.658(4)                                 |
| <i>c</i> (Å)                                                                                                   | 23.9520(14)                               | 10.1503(16)                               |
| <i>α</i> (deg)                                                                                                 | 90                                        | 90                                        |
| <i>β</i> (deg)                                                                                                 | 101.5870(10)                              | 90                                        |
| <i>γ</i> (deg)                                                                                                 | 90                                        | 90                                        |
| <i>V</i> (Å <sup>3</sup> )                                                                                     | 4405.4(4)                                 | 4777.9(13)                                |
| <i>Z</i>                                                                                                       | 4                                         | 4                                         |
| $\rho_{\text{calcd}}$ (mg/cm <sup>3</sup> )                                                                    | 1.639                                     | 1.650                                     |
| $\mu$ (Mo K $\alpha$ ) (mm <sup>-1</sup> )                                                                     | 3.263                                     | 3.017                                     |
| <i>F</i> (000)                                                                                                 | 2144                                      | 2352                                      |
| Reflns collected                                                                                               | 24504                                     | 33901                                     |
| Unique                                                                                                         | 7767                                      | 4215                                      |
| Data/restraints/params                                                                                         | 7767/ 180 / 615                           | 4215 / 102 / 345                          |
| GOF on <i>F</i> <sup>2</sup>                                                                                   | 1.032                                     | 1.162                                     |
| <i>R</i> <sub>1</sub> <sup>a</sup> , <i>wR</i> <sub>2</sub> <sup>b</sup> [ <i>I</i> > 2 $\sigma$ ( <i>I</i> )] | 0.0278, 0.0622                            | 0.0461, 0.1035                            |
| <i>R</i> <sub>1</sub> <sup>a</sup> , <i>wR</i> <sub>2</sub> <sup>b</sup> (all data)                            | 0.0379, 0.0666                            | 0.0495, 0.1051                            |
| CCDC NO                                                                                                        | 1878027                                   | 1878028                                   |

$$R_1^a = \frac{\sum |F_o| - |F_c|}{\sum F_o}, \quad wR_2^b = \left[ \frac{\sum w(F_o^2 - F_c^2)^2}{\sum w(F_o^2)} \right]^{1/2}$$



**Table S2a** The selected bond lengths and angles of **Ir(tfpmd)<sub>2</sub>(stpip)**.

| Selected bonds Å |          |             |           |             |            |
|------------------|----------|-------------|-----------|-------------|------------|
| C1-C6            | 1.374(5) | C26-C27     | 1.384(7)  | C40-C43     | 1.455(5)   |
| C1-C2            | 1.385(7) | C27-C28     | 1.370(6)  | C41-C42     | 1.407(5)   |
| C1-H1            | 0.93     | C27-H27     | 0.93      | C41-Ir1     | 2.030(4)   |
| C2-C3            | 1.354(8) | C28-C29     | 1.390(6)  | C42-H42     | 0.93       |
| C2-H2            | 0.93     | C28-H28     | 0.93      | C43-N2      | 1.337(5)   |
| C3-C4            | 1.329(7) | C29-C30     | 1.405(6)  | C43-N1      | 1.369(4)   |
| C3-H3            | 0.93     | C29-C32     | 1.463(6)  | C44-N2      | 1.334(6)   |
| C4-C5            | 1.379(7) | C30-C31     | 1.408(5)  | C44-C45     | 1.374(6)   |
| C4-H4            | 0.93     | C30-Ir1     | 2.012(4)  | C44-H44     | 0.93       |
| C5-C6            | 1.378(6) | C31-H31     | 0.93      | C22-C23     | 1.344(9)   |
| C5-H5            | 0.93     | C32-N4      | 1.337(5)  | C22-H22     | 0.93       |
| C6-P2            | 1.812(4) | C32-N3      | 1.361(5)  | C23-C24     | 1.368(7)   |
| C7-C12           | 1.381(5) | C33-N4      | 1.324(6)  | C23-H23     | 0.93       |
| C7-C8            | 1.392(7) | C33-C34     | 1.370(7)  | C24-H24     | 0.93       |
| C7-H7            | 0.93     | C33-H33     | 0.93      | C25-F1'     | 1.255(13)  |
| C8-C9            | 1.358(8) | C34-C35     | 1.378(6)  | C25-F2      | 1.283(11)  |
| C8-H8            | 0.93     | C34-H34     | 0.93      | C25-F1      | 1.353(11)  |
| C9-C10           | 1.344(8) | C35-N3      | 1.339(5)  | C25-F3      | 1.352(10)  |
| C9-H9            | 0.93     | C35-H35     | 0.93      | C25-F2'     | 1.371(13)  |
| C10-C11          | 1.395(7) | C36-F5'     | 1.247(11) | C25-F3'     | 1.431(14)  |
| C10-H10          | 0.93     | C36-F4      | 1.275(10) | C25-C26     | 1.471(7)   |
| C11-C12          | 1.381(6) | C36-F5      | 1.332(8)  | C45-C46     | 1.369(6)   |
| C11-H11          | 0.93     | C36-F6'     | 1.360(13) | C45-H45     | 0.93       |
| C12-P2           | 1.808(4) | C36-F4'     | 1.369(11) | C46-N1      | 1.342(5)   |
| C13-C18          | 1.372(6) | C36-F6      | 1.410(9)  | C46-H46     | 0.93       |
| C13-C14          | 1.401(6) | C36-C37     | 1.480(7)  | Ir1-N1      | 2.053(3)   |
| C13-H13          | 0.93     | C37-C38     | 1.386(6)  | Ir1-N3      | 2.052(3)   |
| C14-C15          | 1.361(7) | C37-C42     | 1.389(6)  | Ir1-S1      | 2.4700(9)  |
| C14-H14          | 0.93     | C38-C39     | 1.376(6)  | Ir1-S2      | 2.4762(10) |
| C15-C16          | 1.363(7) | C38-H38     | 0.93      | N5-P1       | 1.582(3)   |
| C15-H15          | 0.93     | C39-C40     | 1.396(5)  | N5-P2       | 1.588(3)   |
| C16-C17          | 1.376(5) | C39-H39     | 0.93      | P1-S1       | 2.0058(13) |
| C26-C31          | 1.374(6) | C40-C41     | 1.389(5)  | P2-S2       | 2.0173(14) |
| C1-C6            | 1.374(5) | C26-C27     | 1.384(7)  | C40-C43     | 1.455(5)   |
| C1-C2            | 1.385(7) | C27-C28     | 1.370(6)  | C41-C42     | 1.407(5)   |
| C1-H1            | 0.93     | C27-H27     | 0.93      | C41-Ir1     | 2.030(4)   |
| Selected angles° |          |             |           |             |            |
|                  |          |             |           |             |            |
| C6-C1-C2         | 120.6(5) | C29-C30-Ir1 | 114.8(3)  | C14-C13-H13 | 119.8      |
| C6-C1-H1         | 119.7    | C31-C30-Ir1 | 128.2(3)  | C15-C14-C13 | 119.2(5)   |

|             |          |             |            |             |          |
|-------------|----------|-------------|------------|-------------|----------|
| C2-C1-H1    | 119.7    | C26-C31-C30 | 120.7(4)   | C15-C14-H14 | 120.4    |
| C3-C2-C1    | 121.1(5) | C26-C31-H31 | 119.6      | C13-C14-H14 | 120.4    |
| C3-C2-H2    | 119.4    | C30-C31-H31 | 119.6      | C14-C15-C16 | 120.9(4) |
| C1-C2-H2    | 119.4    | N4-C32-N3   | 124.6(4)   | C14-C15-H15 | 119.6    |
| C4-C3-C2    | 118.7(5) | N4-C32-C29  | 120.9(4)   | C16-C15-H15 | 119.6    |
| C4-C3-H3    | 120.6    | N3-C32-C29  | 114.5(3)   | C15-C16-C17 | 119.7(4) |
| C2-C3-H3    | 120.6    | N4-C33-C34  | 124.0(4)   | C15-C16-H16 | 120.1    |
| C3-C4-C5    | 121.7(6) | N4-C33-H33  | 118        | C17-C16-H16 | 120.1    |
| C3-C4-H4    | 119.2    | C34-C33-H33 | 118        | C18-C17-C16 | 121.0(4) |
| C5-C4-H4    | 119.2    | C33-C34-C35 | 117.0(4)   | C18-C17-H17 | 119.5    |
| C6-C5-C4    | 120.9(5) | C33-C34-H34 | 121.5      | C16-C17-H17 | 119.5    |
| C6-C5-H5    | 119.6    | C35-C34-H34 | 121.5      | C13-C18-C17 | 118.8(4) |
| C4-C5-H5    | 119.6    | N3-C35-C34  | 120.9(4)   | C13-C18-P1  | 120.4(3) |
| C1-C6-C5    | 117.0(4) | N3-C35-H35  | 119.5      | C17-C18-P1  | 120.8(3) |
| C1-C6-P2    | 122.5(3) | C34-C35-H35 | 119.5      | C20-C19-C24 | 118.9(4) |
| C5-C6-P2    | 120.4(3) | F4-C36-F5   | 109.8(7)   | C20-C19-P1  | 120.6(3) |
| C12-C7-C8   | 119.9(5) | F5'-C36-F6' | 109.0(9)   | C24-C19-P1  | 120.4(4) |
| C12-C7-H7   | 120.1    | F5'-C36-F4' | 106.0(8)   | C19-C20-C21 | 120.2(4) |
| C8-C7-H7    | 120.1    | F6'-C36-F4' | 100.2(8)   | C19-C20-H20 | 119.9    |
| C9-C8-C7    | 119.8(5) | F4-C36-F6   | 103.3(7)   | C21-C20-H20 | 119.9    |
| C9-C8-H8    | 120.1    | F5-C36-F6   | 99.4(6)    | C22-C21-C20 | 118.6(6) |
| C7-C8-H8    | 120.1    | F5'-C36-C37 | 116.0(6)   | C22-C21-H21 | 120.7    |
| C10-C9-C8   | 121.5(5) | F4-C36-C37  | 116.3(6)   | C20-C21-H21 | 120.7    |
| C10-C9-H9   | 119.2    | F5-C36-C37  | 115.4(6)   | C23-C22-C21 | 121.4(5) |
| C8-C9-H9    | 119.2    | F6'-C36-C37 | 114.5(6)   | C23-C22-H22 | 119.3    |
| C9-C10-C11  | 119.5(6) | F4'-C36-C37 | 109.7(6)   | C21-C22-H22 | 119.3    |
| C9-C10-H10  | 120.2    | F6-C36-C37  | 110.6(5)   | C22-C23-C24 | 120.5(5) |
| C11-C10-H10 | 120.2    | C38-C37-C42 | 121.5(4)   | C22-C23-H23 | 119.8    |
| C12-C11-C10 | 120.4(5) | C38-C37-C36 | 119.1(4)   | C24-C23-H23 | 119.8    |
| C12-C11-H11 | 119.8    | C42-C37-C36 | 119.4(4)   | C23-C24-C19 | 120.4(5) |
| C10-C11-H11 | 119.8    | C39-C38-C37 | 119.0(4)   | C23-C24-H24 | 119.8    |
| C11-C12-C7  | 118.9(4) | C39-C38-H38 | 120.5      | C19-C24-H24 | 119.8    |
| C11-C12-P2  | 119.0(3) | C37-C38-H38 | 120.5      | C41-C40-C39 | 122.5(4) |
| C7-C12-P2   | 122.1(3) | C38-C39-C40 | 119.7(4)   | C41-C40-C43 | 115.5(3) |
| C18-C13-C14 | 120.5(4) | C38-C39-H39 | 120.2      | C39-C40-C43 | 122.0(4) |
| C18-C13-H13 | 119.8    | C40-C39-H39 | 120.2      | C40-C41-C42 | 117.0(3) |
| C40-C41-Ir1 | 114.6(3) | C30-Ir1-S2  | 172.41(11) | C29-C30-C31 | 116.6(4) |
| C42-C41-Ir1 | 128.3(3) | C41-Ir1-S2  | 85.87(11)  | N3-Ir1-S2   | 92.77(9) |

|             |            |             |           |            |            |
|-------------|------------|-------------|-----------|------------|------------|
| C37-C42-C41 | 120.3(4)   | N1-Ir1-S2   | 90.29(9)  | S1-Ir1-S2  | 102.51(3)  |
| C37-C42-H42 | 119.8      | F2-C25-F1   | 104.0(8)  | C46-N1-C43 | 117.2(3)   |
| C41-C42-H42 | 119.8      | F2-C25-F3   | 105.1(9)  | C46-N1-Ir1 | 127.7(2)   |
| N2-C43-N1   | 123.5(4)   | F1-C25-F3   | 104.1(7)  | C43-N1-Ir1 | 115.1(2)   |
| N2-C43-C40  | 121.7(3)   | F1'-C25-F2' | 110.4(10) | C44-N2-C43 | 117.3(4)   |
| N1-C43-C40  | 114.7(3)   | F1'-C25-F3' | 107.4(10) | C35-N3-C32 | 117.5(3)   |
| N2-C44-C45  | 122.8(4)   | F2'-C25-F3' | 98.2(9)   | C35-N3-Ir1 | 127.0(3)   |
| N2-C44-H44  | 118.6      | F1'-C25-C26 | 117.3(8)  | C32-N3-Ir1 | 115.4(2)   |
| C45-C44-H44 | 118.6      | F2-C25-C26  | 115.5(6)  | C33-N4-C32 | 115.9(4)   |
| C46-C45-C44 | 117.1(4)   | F1-C25-C26  | 113.5(7)  | P1-N5-P2   | 133.8(2)   |
| C46-C45-H45 | 121.4      | F3-C25-C26  | 113.5(6)  | N5-P1-C18  | 106.79(19) |
| C44-C45-H45 | 121.4      | F2'-C25-C26 | 110.8(7)  | N5-P1-C19  | 110.29(19) |
| N1-C46-C45  | 121.9(4)   | F3'-C25-C26 | 111.1(6)  | C18-P1-C19 | 104.81(16) |
| N1-C46-H46  | 119        | C31-C26-C27 | 121.5(4)  | N5-P1-S1   | 119.41(13) |
| C45-C46-H46 | 119        | C31-C26-C25 | 120.0(5)  | C18-P1-S1  | 106.00(13) |
| C30-Ir1-C41 | 91.68(15)  | C27-C26-C25 | 118.5(5)  | C19-P1-S1  | 108.49(14) |
| C30-Ir1-N1  | 96.36(14)  | C28-C27-C26 | 119.3(4)  | N5-P2-C12  | 106.51(18) |
| C41-Ir1-N1  | 80.01(13)  | C28-C27-H27 | 120.4     | N5-P2-C6   | 108.60(18) |
| C30-Ir1-N3  | 80.24(14)  | C26-C27-H27 | 120.4     | C12-P2-C6  | 104.15(19) |
| C41-Ir1-N3  | 94.27(13)  | C27-C28-C29 | 120.0(4)  | N5-P2-S2   | 120.00(14) |
| N1-Ir1-N3   | 173.31(12) | C27-C28-H28 | 120       | C12-P2-S2  | 107.80(15) |
| C30-Ir1-S1  | 80.89(10)  | C29-C28-H28 | 120       | C6-P2-S2   | 108.64(14) |
| C41-Ir1-S1  | 168.95(11) | C28-C29-C30 | 121.9(4)  | P1-S1-Ir1  | 108.37(5)  |
| N1-Ir1-S1   | 92.63(8)   | C28-C29-C32 | 123.3(4)  | P2-S2-Ir1  | 111.20(5)  |
| N3-Ir1-S1   | 92.51(8)   | C30-C29-C32 | 114.8(4)  |            |            |

**Table S2b** The selected bond lengths and angles of **Ir(tfpqz)<sub>2</sub>(stpip)**.

| Selected bonds Å |            |           |           |             |           |
|------------------|------------|-----------|-----------|-------------|-----------|
| Ir(1)-C(6)       | 2.002(6)   | C(2)-C(3) | 1.383(10) | C(31)-C(32) | 1.376(12) |
| Ir(1)-C(6)#1     | 2.002(6)   | C(2)-C(7) | 1.395(9)  | C(31)-C(36) | 1.395(11) |
| Ir(1)-N(1)#1     | 2.043(5)   | C(3)-C(4) | 1.392(9)  | C(32)-C(33) | 1.399(11) |
| Ir(1)-N(1)       | 2.043(5)   | C(3)-H(3) | 0.95      | C(32)-H(32) | 0.95      |
| Ir(1)-S(1)#1     | 2.4875(16) | C(4)-C(5) | 1.400(9)  | C(33)-C(34) | 1.378(18) |
| Ir(1)-S(1)       | 2.4875(16) | C(4)-H(4) | 0.95      | C(33)-H(33) | 0.95      |
| S(1)-P(1)        | 2.017(2)   | C(5)-C(6) | 1.432(9)  | C(34)-C(35) | 1.352(19) |
| P(1)-N(5)        | 1.587(4)   | C(5)-C(8) | 1.460(7)  | C(34)-H(34) | 0.95      |
| P(1)-C(42)       | 1.816(7)   | C(6)-C(7) | 1.397(8)  | C(35)-C(36) | 1.382(15) |

|                              |            |                  |           |                   |           |
|------------------------------|------------|------------------|-----------|-------------------|-----------|
| P(1)-C(31)                   | 1.830(8)   | C(7)-H(7)        | 0.95      | C(35)-H(35)       | 0.95      |
| N(1)-C(8)                    | 1.343(7)   | C(8)-C(9)        | 1.430(8)  | C(36)-H(36)       | 0.95      |
| N(1)-C(15)                   | 1.378(8)   | C(9)-C(10)       | 1.401(9)  | C(37)-C(38)       | 1.379(10) |
| N(2)-C(15)                   | 1.299(8)   | C(9)-C(14)       | 1.424(9)  | C(37)-C(42)       | 1.380(10) |
| N(2)-C(14)                   | 1.359(9)   | C(10)-C(11)      | 1.358(10) | C(37)-H(37)       | 0.95      |
| N(5)-P(1)#1                  | 1.587(4)   | C(10)-H(10)      | 0.95      | C(38)-C(39)       | 1.374(13) |
| C(1)-F(2)                    | 1.266(9)   | C(11)-C(12)      | 1.397(12) | C(38)-H(38)       | 0.95      |
| C(1)-F(1)                    | 1.268(15)  | C(11)-H(11)      | 0.95      | C(39)-C(40)       | 1.371(13) |
| C(1)-F(1)                    | 1.327(9)   | C(12)-C(13)      | 1.358(12) | C(39)-H(39)       | 0.95      |
| C(1)-F(3)                    | 1.373(9)   | C(12)-H(12)      | 0.95      | C(40)-C(41)       | 1.383(11) |
| C(1)-F(3')                   | 1.378(14)  | C(13)-C(14)      | 1.409(9)  | C(40)-H(40)       | 0.95      |
| C(1)-F(2')                   | 1.419(14)  | C(13)-H(13)      | 0.95      | C(41)-C(42)       | 1.390(10) |
| C(1)-C(2)                    | 1.499(9)   | C(15)-H(15)      | 0.95      | C(41)-H(41)       | 0.95      |
| Selected angles <sup>o</sup> |            |                  |           |                   |           |
| C(6)-Ir(1)-C(6)#1            | 91.2(3)    | F(2)-C(1)-C(2)   | 113.4(6)  | N(2)-C(14)-C(13)  | 118.5(6)  |
| C(6)-Ir(1)-N(1)#1            | 96.8(2)    | F(1)-C(1)-C(2)   | 121.5(9)  | N(2)-C(14)-C(9)   | 122.0(6)  |
| C(6)#1-Ir(1)-N(1)#1          | 79.5(2)    | F(1)-C(1)-C(2)   | 111.5(6)  | C(13)-C(14)-C(9)  | 119.4(6)  |
| C(6)-Ir(1)-N(1)              | 79.5(2)    | F(3)-C(1)-C(2)   | 112.1(6)  | N(2)-C(15)-N(1)   | 125.5(6)  |
| C(6)#1-Ir(1)-N(1)            | 96.8(2)    | F(3)-C(1)-C(2)   | 110.7(8)  | N(2)-C(15)-H(15)  | 117.3     |
| N(1)#1-Ir(1)-N(1)            | 174.8(3)   | F(2)-C(1)-C(2)   | 113.0(7)  | N(1)-C(15)-H(15)  | 117.3     |
| C(6)-Ir(1)-S(1)#1            | 83.76(17)  | C(3)-C(2)-C(7)   | 121.2(6)  | C(32)-C(31)-C(36) | 120.9(8)  |
| C(6)#1-Ir(1)-S(1)#1          | 171.10(17) | C(3)-C(2)-C(1)   | 119.6(6)  | C(32)-C(31)-P(1)  | 119.5(6)  |
| N(1)#1-Ir(1)-S(1)#1          | 93.75(14)  | C(7)-C(2)-C(1)   | 119.1(6)  | C(36)-C(31)-P(1)  | 119.4(8)  |
| N(1)-Ir(1)-S(1)#1            | 89.53(15)  | C(2)-C(3)-C(4)   | 119.6(6)  | C(31)-C(32)-C(33) | 118.8(9)  |
| C(6)-Ir(1)-S(1)              | 171.10(17) | C(2)-C(3)-H(3)   | 120.2     | C(31)-C(32)-H(32) | 120.6     |
| C(6)#1-Ir(1)-S(1)            | 83.76(17)  | C(4)-C(3)-H(3)   | 120.2     | C(33)-C(32)-H(32) | 120.6     |
| N(1)#1-Ir(1)-S(1)            | 89.53(15)  | C(3)-C(4)-C(5)   | 119.8(6)  | C(32)-C(33)-C(34) | 120.3(12) |
| N(1)-Ir(1)-S(1)              | 93.75(14)  | C(3)-C(4)-H(4)   | 120.1     | C(32)-C(33)-H(33) | 119.9     |
| S(1)#1-Ir(1)-S(1)            | 102.12(8)  | C(5)-C(4)-H(4)   | 120.1     | C(34)-C(33)-H(33) | 119.9     |
| P(1)-S(1)-Ir(1)              | 109.61(8)  | C(4)-C(5)-C(6)   | 121.1(5)  | C(35)-C(34)-C(33) | 119.9(10) |
| N(5)-P(1)-C(42)              | 107.8(3)   | C(4)-C(5)-C(8)   | 124.5(6)  | C(35)-C(34)-H(34) | 120       |
| N(5)-P(1)-C(31)              | 110.6(3)   | C(6)-C(5)-C(8)   | 113.9(5)  | C(33)-C(34)-H(34) | 120       |
| C(42)-P(1)-C(31)             | 104.2(3)   | C(7)-C(6)-C(5)   | 117.1(6)  | C(34)-C(35)-C(36) | 121.7(12) |
| N(5)-P(1)-S(1)               | 119.4(3)   | C(7)-C(6)-Ir(1)  | 128.3(5)  | C(34)-C(35)-H(35) | 119.1     |
| C(42)-P(1)-S(1)              | 105.8(2)   | C(5)-C(6)-Ir(1)  | 114.6(4)  | C(36)-C(35)-H(35) | 119.1     |
| C(31)-P(1)-S(1)              | 107.9(3)   | C(6)-C(7)-C(2)   | 121.0(6)  | C(31)-C(36)-C(35) | 118.4(12) |
| C(8)-N(1)-C(15)              | 118.8(5)   | C(6)-C(7)-H(7)   | 119.5     | C(31)-C(36)-H(36) | 120.8     |
| C(8)-N(1)-Ir(1)              | 116.1(4)   | C(2)-C(7)-H(7)   | 119.5     | C(35)-C(36)-H(36) | 120.8     |
| C(15)-N(1)-Ir(1)             | 125.1(4)   | N(1)-C(8)-C(9)   | 118.6(5)  | C(38)-C(37)-C(42) | 120.8(8)  |
| C(15)-N(2)-C(14)             | 117.0(5)   | N(1)-C(8)-C(5)   | 113.6(5)  | C(38)-C(37)-H(37) | 119.6     |
| P(1)#1-N(5)-P(1)             | 134.1(6)   | C(9)-C(8)-C(5)   | 127.8(5)  | C(42)-C(37)-H(37) | 119.6     |
| F(2)-C(1)-F(1')              | 125.0(10)  | C(10)-C(9)-C(14) | 118.1(6)  | C(37)-C(38)-C(39) | 120.2(8)  |
| F(2)-C(1)-F(1)               | 112.3(7)   | C(10)-C(9)-C(8)  | 125.5(6)  | C(37)-C(38)-H(38) | 119.9     |

|                  |           |                   |          |                   |          |
|------------------|-----------|-------------------|----------|-------------------|----------|
| F(1')-C(1)-F(1)  | 50.1(9)   | C(14)-C(9)-C(8)   | 116.3(6) | C(39)-C(38)-H(38) | 119.9    |
| F(2)-C(1)-F(3)   | 106.8(7)  | C(11)-C(10)-C(9)  | 120.5(7) | C(40)-C(39)-C(38) | 119.9(8) |
| F(1')-C(1)-F(3)  | 50.0(9)   | C(11)-C(10)-H(10) | 119.7    | C(40)-C(39)-H(39) | 120.1    |
| F(1)-C(1)-F(3)   | 99.9(6)   | C(9)-C(10)-H(10)  | 119.7    | C(38)-C(39)-H(39) | 120.1    |
| F(2)-C(1)-F(3')  | 43.5(7)   | C(12)-C(11)-C(10) | 121.5(8) | C(39)-C(40)-C(41) | 120.0(8) |
| F(1')-C(1)-F(3') | 108.9(10) | C(12)-C(11)-H(11) | 119.3    | C(39)-C(40)-H(40) | 120      |
| F(1)-C(1)-F(3')  | 137.5(9)  | C(10)-C(11)-H(11) | 119.3    | C(41)-C(40)-H(40) | 120      |
| F(3)-C(1)-F(3')  | 68.1(8)   | C(11)-C(12)-C(13) | 119.7(7) | C(40)-C(41)-C(42) | 120.7(8) |
| F(2)-C(1)-F(2')  | 53.1(7)   | C(11)-C(12)-H(12) | 120.2    | C(40)-C(41)-H(41) | 119.7    |
| F(1')-C(1)-F(2)  | 104.3(10) | C(13)-C(12)-H(12) | 120.2    | C(42)-C(41)-H(41) | 119.7    |
| F(1)-C(1)-F(2)   | 63.9(8)   | C(12)-C(13)-C(14) | 120.4(7) | C(37)-C(42)-C(41) | 118.3(7) |
| F(3)-C(1)-F(2')  | 134.9(8)  | C(12)-C(13)-H(13) | 119.8    | C(37)-C(42)-P(1)  | 122.6(5) |
| F(3')-C(1)-F(2)  | 95.0(9)   | C(14)-C(13)-H(13) | 119.8    | C(41)-C(42)-P(1)  | 119.1(6) |

**Table S3** Data of theoretical calculation of orbital energy level and electron cloud distribution

| Complex                             | Orbital | Energy/ eV | E <sub>gap</sub> / eV | Composition (%) |              |                   |
|-------------------------------------|---------|------------|-----------------------|-----------------|--------------|-------------------|
|                                     |         |            |                       | Ir              | Main ligands | Ancillary ligands |
| <b>Ir(tfpm�)<sub>2</sub>(stpip)</b> | HOMO    | -5.74      | 3.74                  | 49.24           | 33.26        | 24.24             |
|                                     | LUMO    | -2.00      |                       | 3.33            | 82.93        | 17.32             |
| <b>Ir(tfpqz)<sub>2</sub>(stpip)</b> | HOMO    | -5.79      | 3.24                  | 46.56           | 35.96        | 17.48             |
|                                     | LUMO    | -2.55      |                       | 4.19            | 86.16        | 9.65              |

## References

- (a) D. P. Rillema, D. G. Taghdiri, D. S. Jones, C. D. Keller, L. A. Worl, T. J. Meyer and H. A. Levy, *Inorg. Chem.*, 1987, **26**, 578; (b) K. A. King, P. J. Spellane and R. J. Watts, *J. Am. Chem. Soc.*, 1985, **25**, 1431.
- SAINT-Plus, version 6.02*, Bruker Analytical X-ray System, Madison, WI, 1999.
- G. M. Sheldrick, *SADABS An empirical absorption correction program, Bruker Analytical X-ray Systems, Madison, WI, 1996*.
- G. M. Sheldrick, *SHELXTL-2014*, Universität of Göttingen, Göttingen, Germany, 2014.
